# Supplementary material for: A DNA aptamer for trivalent lanthanide ions with low nanomolar affinity
Source: Royal Society of Chemistry journal article supplement (doi:10.1039/d5qi00391a), 2025-01-01
Supplement: d5qi00391a2.xlsx [file d5qi00391a2.xlsx]

## Sheet: Figure 2A
Wavelength (nm)	0 µM	0.01 µM	0.02 µM	0.05 µM	0.1 µM	0.2 µM	0.5 µM	0.75 µM	1 µM	2 µM
461.94	114.459	95.9113	90.8418	80.1629	64.3297	44.4348	24.0163	20.1423	21.0023	19.8452
462.98	135.959	114.08	107.786	95.0036	76.2641	52.8614	27.9294	23.6726	24.0394	22.5914
464.02	156.647	131.557	124.09	109.281	87.7498	60.9742	31.7005	27.0624	26.9599	25.2318
465.07	176.523	148.344	139.754	122.994	98.7869	68.7733	35.3294	30.3118	29.7637	27.7663
465.97	195.587	164.439	154.778	136.144	109.375	76.2587	38.8161	33.4207	32.4509	30.195
467.01	213.839	179.844	169.161	148.731	119.515	83.4303	42.1607	36.3891	35.0214	32.5179
468.05	231.279	194.558	182.905	160.754	129.206	90.2881	45.3632	39.2171	37.4752	34.735
468.95	247.907	208.581	196.008	172.213	138.448	96.8323	48.4235	41.9045	39.8124	36.8462
470	263.723	221.913	208.471	183.109	147.242	103.063	51.3417	44.4515	42.033	38.8516
471.04	278.728	234.554	220.294	193.441	155.587	108.979	54.1177	46.858	44.1369	40.7512
471.94	292.92	246.504	231.477	203.209	163.484	114.582	56.7516	49.1241	46.1241	42.545
472.98	306.301	257.764	242.02	212.414	170.931	119.871	59.2433	51.2496	47.9947	44.2329
474.02	318.869	268.332	251.923	221.056	177.931	124.847	61.5928	53.2347	49.7486	45.815
475.07	330.626	278.21	261.185	229.134	184.481	129.509	63.8003	55.0793	51.3859	47.2913
475.97	341.571	287.397	269.808	236.648	190.583	133.857	65.8656	56.7834	52.9065	48.6618
477.01	351.704	295.893	277.79	243.599	196.236	137.891	67.7887	58.3471	54.3105	49.9265
478.05	361.025	303.698	285.132	249.986	201.44	141.611	69.5697	59.7702	55.5978	51.0853
478.95	369.534	310.812	291.834	255.809	206.196	145.018	71.2085	61.0529	56.7685	52.1383
480	377.231	317.235	297.896	261.069	210.503	148.111	72.7052	62.1951	57.8225	53.0855
481.06	384.699	323.463	303.961	265.974	214.861	151.224	74.2839	63.2686	58.9496	54.0832
481.96	391.06	328.647	309.129	270.384	218.563	153.857	75.6245	64.185	59.9705	55.0386
483.03	396.617	333.03	313.426	274.103	221.621	156.162	76.8636	64.8764	60.8758	55.7433
483.93	401.348	336.623	317.087	277.15	224.025	158.113	78.0122	65.371	61.5363	56.2612
485	405.031	339.457	320.084	279.314	226.061	159.635	78.852	65.6913	61.9558	56.6577
486.06	407.632	341.539	322.321	281.001	227.814	160.663	79.4509	65.9071	62.2032	56.9576
486.96	409.12	342.923	323.589	282.173	228.888	161.294	79.7892	66.0914	62.3777	57.0447
488.03	409.841	343.476	323.922	282.694	229.081	161.527	79.9069	66.15	62.3984	56.9928
488.93	409.694	343.454	323.506	282.535	228.658	161.513	79.8698	65.9919	62.2138	56.8407
490	408.757	342.573	322.456	281.957	227.964	161.405	79.8046	65.6673	61.8155	56.5862
491.04	407.268	340.93	320.917	280.916	226.975	160.883	79.5413	65.2369	61.3106	56.1243
491.94	405.093	338.521	318.785	279.473	225.752	159.857	79.0421	64.7557	60.8014	55.5738
492.98	402.084	335.849	316.123	277.327	224.091	158.493	78.4279	64.1337	60.2386	54.9561
494.02	398.186	332.578	313.149	274.948	221.973	157.061	77.7928	63.496	59.4971	54.3127
495.07	394.177	329.033	309.824	272.296	219.615	155.319	77.076	62.7281	58.6161	53.4761
495.97	389.795	325.027	306.064	269.454	217.171	153.399	76.2386	61.9802	57.6682	52.5989
497.01	384.815	320.884	301.968	266.082	214.331	151.277	75.2438	61.1085	56.6902	51.6917
498.05	379.308	316.4	297.61	262.511	211.2	149.109	74.2308	60.1686	55.6442	50.8254
498.95	373.728	311.702	292.97	258.662	207.998	146.912	73.074	59.1543	54.4941	49.903
500	367.993	306.662	288.293	254.528	204.812	144.711	71.8448	58.1073	53.3857	48.9701
501.02	363.154	302.633	284.468	251.132	202.09	142.806	70.8571	57.2411	52.509	48.1914
502.05	358.061	298.413	280.466	247.544	199.23	140.801	69.8097	56.3405	51.6066	47.386
502.94	352.714	294.001	276.288	243.766	196.234	138.695	68.7027	55.4055	50.6784	46.554
503.97	347.112	289.398	271.933	239.798	193.102	136.489	67.5361	54.4362	49.7245	45.6953
505	341.256	284.602	267.401	235.638	189.832	134.182	66.3099	53.4324	48.7447	44.81
506.02	335.147	279.615	262.693	231.288	186.426	131.775	65.0241	52.3943	47.7392	43.898
507.05	328.783	274.435	257.808	226.747	182.883	129.267	63.6786	51.3218	46.7079	42.9594
507.94	322.164	269.064	252.746	222.015	179.203	126.659	62.2736	50.2148	45.6508	41.9942
508.97	315.292	263.501	247.508	217.093	175.387	123.95	60.809	49.0735	44.568	41.0023
510	308.166	257.747	242.093	211.979	171.434	121.141	59.2847	47.8979	43.4594	39.9837
511.04	300.785	251.8	236.502	206.675	167.344	118.231	57.7009	46.6878	42.325	38.9385
511.94	293.15	245.662	230.734	201.181	163.118	115.22	56.0574	45.4433	41.1648	37.8667
512.98	285.262	239.332	224.79	195.495	158.754	112.109	54.3543	44.1645	39.9788	36.7682
514.02	277.119	232.81	218.668	189.619	154.255	108.898	52.5916	42.8512	38.7671	35.6431
515.07	268.721	226.096	212.371	183.552	149.618	105.586	50.7693	41.5036	37.5296	34.4913
515.97	260.07	219.19	205.896	177.294	144.845	102.173	48.8874	40.1215	36.2663	33.3128
517.01	251.164	212.093	199.245	170.846	139.934	98.6598	46.9459	38.7051	34.9772	32.1078
518.05	242.005	204.803	192.418	164.207	134.888	95.046	44.9448	37.2543	33.6624	30.8761

## Sheet: Figure 2B
Tb-1			Tb-1a			Tb-1b			Tb-4
Concentration of Tb3+ (nM)	F/F0	Stdev.	Concentration of Tb3+ (nM)	F/F0	Stdev.	Concentration of Tb3+ (nM)	F/F0	Stdev.	Concentration of Tb3+ (nM)	F/F0	Stdev.
0	1	0	0	1	0	0	1	0	0	1	0
10	0.857455	0.0222496	10	0.890143	0.01165	10	0.915469	0.030592	50	0.880427	0.0265443
20	0.79254	0.00579	20	0.800309	0.03289	20	0.908129	0.0449335	100	0.759878	0.0212847
50	0.683237	0.0149334	50	0.736348	0.0202754	50	0.859071	0.0554509	200	0.734732	0.0157435
100	0.553344	0.00722	100	0.672849	0.0193927	100	0.82852	0.051132	500	0.679258	0.0283367
200	0.400746	0.00942	200	0.572355	0.0159275	200	0.787318	0.0621718	1000	0.632879	0.00492
500	0.198608	0.00332	500	0.408052	0.00981	500	0.716016	0.0720406	2000	0.567087	0.0229948
750	0.168624	0.000298	750	0.335447	0.0192187	750	0.655872	0.0547489	5000	0.534131	0.023552
1000	0.152616	0.000219	1000	0.280605	0.0216329	1000	0.592721	0.0523494	10000	0.448912	0.0202198
2000	0.137603	0.000984	2000	0.192472	0.0195505	2000	0.470765	0.0418462	20000	0.416914	0.0234854
			5000	0.125418	0.00841	5000	0.307142	0.0327385
						10000	0.155555	0.0114872
						20000	0.0653225	0.0052

## Sheet: Figure 2C
Ions	F/F0	Stdev.
Sc3+	0.76206	0.02043
Y3+	0.28187	0.01158
La3+	0.28838	0.01415
Ce3+	0.28313	0.00877
Ce4+	0.82691	0.03614
Pr3+	0.26532	0.01705
Nd3+	0.20318	0.00825
Sm2+	0.25731	0.01656
Eu3+	0.27017	0.00764
Gd3+	0.27886	0.00432
Tb3+	0.28814	0.01971
Dy3+	0.30384	0.01393
Ho3+	0.24883	0.00636
Er3+	0.25003	0.00882
Tm3+	0.27752	0.01129
Yb3+	0.29857	0.00415
Lu3+	0.29924	0.000207403
Ca2+	0.96504	0.0076
Cr3+	1.00997	0.05574
Mn2+	0.98502	0.02136
Fe2+	0.95769	0.04438
Fe3+	0.83543	0.00641
Co2+	0.80371	0.05299
Ni2+	0.69229	0.01276
Cu2+	0.15489	0.04219
Zn2+	0.96054	0.03364
Cd2+	0.78364	0.00275
Ba2+	1.02178	0.04407
Hg2+	0.2311	0.01251
Pb2+	0.87843	0.04893

## Sheet: Figure 3B
Time (min)	0 nM	10 nM	25 nM	50 nM	75 nM	100 nM	500 nM	1000 nM
0	1890	1833	1908	1901	1918	1866	1855	1896
0.5	1884	1845	1913	1919	1926	1884	1870	1905
1	1879	1824	1901	1915	1926	1875	1860	1910
1.5	1864	1826	1905	1902	1906	1886	1876	1914
2	1875	1824	1899	1912	1919	1893	1876	1923
2.5	1859	1833	1903	1912	1924	1883	1867	1929
3	1858	1835	1898	1899	1903	1888	1882	1907
3.5	1853	1827	1914	1911	1918	1907	1882	1908
4	1859	1823	1904	1912	1913	1898	1894	1937
4.5	1864	1828	1918	1913	1930	1901	1890	1930
5	1869	1835	1910	1918	1929	1908	1904	1948
5.5	1917	2031	2462	2976	3484	3954	4742	4900
6	1910	2044	2523	3126	3707	4110	4757	4927
6.5	1929	2041	2553	3231	3802	4144	4750	4933
7	1919	2043	2582	3288	3854	4173	4766	4958
7.5	1921	2050	2587	3318	3876	4183	4762	4972
8	1923	2054	2614	3323	3872	4177	4776	4951
8.5	1929	2048	2621	3334	3858	4171	4763	4974
9	1928	2039	2633	3330	3858	4134	4778	5005
9.5	1921	2047	2622	3308	3836	4163	4779	4996
10	1941	2050	2628	3287	3838	4145	4784	5031
10.5	1936	2050	2624	3296	3809	4125	4778	5009
11	1948	2045	2626	3277	3809	4125	4785	5033
11.5	1947	2037	2614	3256	3784	4119	4774	5027
12	1944	2033	2603	3242	3773	4102	4784	5036
12.5	1932	2026	2600	3227	3760	4091	4770	5043
13	1945	2015	2591	3218	3752	4086	4783	5054
13.5	1944	2021	2595	3205	3745	4085	4776	5045
14	1946	2011	2575	3184	3702	4058	4787	5049
14.5	1957	2012	2573	3179	3716	4065	4787	5056
15	1944	2009	2565	3161	3712	4057	4787	5080

## Sheet: Figure 3C
Concentration of Tb3+ (nM)	(F-F0)/F0	Stdev.
0	0.0440494	0.00554518
10	0.117292	0.0317765
25	0.373633	0.0434178
50	0.681952	0.0487082
75	0.91153	0.0181062
100	1.10882	0.025117
500	1.53795	0.032998
1000	1.63464	0.0375457

## Sheet: Figure 3D
Ions	(F-F0)/F0	Stdev.
Blank	-0.00957	0.00329
Sc3+	-0.71442	0.07841
Y3+	1.2356	0.02901
La3+	0.75573	0.07673
Ce3+	1.32234	0.02862
Pr3+	1.26232	0.0793
Nd3+	1.36865	0.05725
Sm3+	1.32328	0.11589
Eu3+	1.45574	0.1773
Gd3+	1.49776	0.09944
Tb3+	1.53795	0.033
Dy3+	1.45308	0.15055
Ho3+	1.34506	0.17055
Er3+	1.53183	0.15671
Tm3+	1.46413	0.09264
Yb3+	1.35228	0.10745
Lu3+	1.59341	0.07942
Ca2+	-0.0999	0.04958
Cr3+	-0.54672	0.12551
Mn2+	-0.03445	0.03987
Fe2+	-0.64665	0.10548
Fe3+	-0.8736	0.00314
Co2+	-0.06884	0.01282
Ni2+	-0.04321	0.04968
Cu2+	-0.8426	0.00922
Zn2+	-0.07702	0.06531
Cd2+	-0.16209	0.00947
Ba2+	-0.07724	0.00446
Hg2+	-0.37564	0.02681
Pb2+	-0.16839	0.0561

## Sheet: Figure 4A
Concentration of Tb3+ (µM)	F/F0	Stdev.
0	1	0
0.05	0.941843	0.0184784
0.2	0.873192	0.0204872
0.2	0.831789	0.0278219
0.5	0.759018	0.0397145
1	0.684999	0.0378276
2	0.564308	0.0214779
5	0.42759	0.0334465
10	0.309708	0.0135333
20	0.291922	0.0327073

## Sheet: Figure 4C Tb-1
Time (min)	F (a.u)
0.02083	438.307
0.02917	437.291
0.0375	435.814
0.04583	436.101
0.05417	437.641
0.0625	437.943
0.07083	435.364
0.07917	434.033
0.0875	433.252
0.09583	434.819
0.10417	435.888
0.1125	437.985
0.12083	437.074
0.12917	436.798
0.1375	436.161
0.14583	437.49
0.15417	438.943
0.1625	440.23
0.17083	438.56
0.17917	437.87
0.1875	438.39
0.19583	438.444
0.20417	437.116
0.2125	438.172
0.22083	440.917
0.22917	438.726
0.2375	437.672
0.24583	438.417
0.25417	441.697
0.2625	440.529
0.27083	440.199
0.27917	438.725
0.2875	438.796
0.29583	439.623
0.30417	439.288
0.3125	440.029
0.32083	439.891
0.32917	438.685
0.3375	436.318
0.34583	437.25
0.35417	438.569
0.3625	440.483
0.37083	441.135
0.37917	440.913
0.3875	439.188
0.39583	439.456
0.40417	441.476
0.4125	440.996
0.42083	440.565
0.42917	441.867
0.4375	444.088
0.44583	442.85
0.45417	440.237
0.4625	439.04
0.47083	440.808
0.47917	441.789
0.4875	441.211
0.49583	439.429
0.50417	439.137
0.5125	439.484
0.52083	440.744
0.52917	440.986
0.5375	440.965
0.54583	441.893
0.55417	442.497
0.5625	443.25
0.57083	442.259
0.57917	442
0.5875	441.742
0.59583	443.415
0.60417	442.163
0.6125	442.509
0.62083	441.819
0.62917	440.372
0.6375	437.46
0.64583	436.406
0.65417	436.769
0.6625	439.008
0.67083	438.863
0.67917	439.138
0.6875	438.469
0.69583	437.683
0.70417	435.114
0.7125	438.303
0.72083	440.331
0.72917	439.172
0.7375	436.291
0.74583	436.393
0.75417	436.917
0.7625	436.625
0.77083	437.046
0.77917	436.582
0.7875	437.194
0.79583	437.611
0.80417	437.37
0.8125	437.473
0.82083	437.286
0.82917	439.26
0.8375	438.113
0.84583	437.421
0.85417	437.668
0.8625	437.325
0.87083	436.975
0.87917	437.52
0.8875	439.817
0.89583	437.597
0.90417	438.422
0.9125	436.303
0.92083	437.116
0.92917	436.601
0.9375	440.379
0.94583	439.445
0.95417	439.955
0.9625	439.325
0.97083	439.833
0.97917	439.351
0.9875	440.049
0.99583	441.051
1.00417	439.412
1.0125	438.082
1.02083	439.298
1.02917	441.426
1.0375	440.225
1.04583	437.817
1.05417	436.485
1.0625	436.773
1.07083	438.745
1.07917	439.496
1.0875	439.35
1.09583	436.724
1.10417	436.058
1.1125	436.42
1.12083	438.701
1.12917	439.711
1.1375	439.892
1.14583	440.25
1.15417	438.533
1.1625	435.375
1.17083	435.392
1.17917	439.462
1.1875	441.271
1.19583	438.2
1.20417	438.115
1.2125	439.287
1.22083	438.998
1.22917	436.918
1.2375	438.926
1.24583	441.814
1.25417	441.791
1.2625	438.094
1.27083	437.469
1.27917	438.326
1.2875	438.476
1.29583	436.59
1.30417	436.786
1.3125	438.497
1.32083	439.548
1.32917	440.589
1.3375	440.223
1.34583	437.9
1.35417	437.458
1.3625	438.192
1.37083	438.432
1.37917	434.956
1.3875	435.211
1.39583	437.707
1.40417	439.768
1.4125	437.826
1.42083	436.179
1.42917	437.086
1.4375	438.844
1.44583	438.373
1.45417	437.99
1.4625	438.223
1.47083	440.634
1.47917	440.535
1.4875	441.54
1.49583	439.809
1.50417	439.633
1.5125	437.057
1.52083	437.844
1.52917	437.891
1.5375	437.048
1.54583	437.745
1.55417	439.253
1.5625	439.938
1.57083	439.053
1.57917	438.274
1.5875	439.122
1.59583	439.424
1.60417	440.156
1.6125	438.505
1.62083	438.008
1.62917	436.009
1.6375	434.704
1.64583	435.51
1.65417	438.391
1.6625	438.953
1.67083	438.893
1.67917	439.94
1.6875	440.526
1.69583	437.452
1.70417	436.345
1.7125	436.349
1.72083	437.906
1.72917	436.715
1.7375	437.901
1.74583	435.793
1.75417	438.043
1.7625	437.324
1.77083	437.96
1.77917	435.822
1.7875	438.412
1.79583	436.43
1.80417	434.779
1.8125	433.366
1.82083	434.302
1.82917	435.836
1.8375	435.657
1.84583	435.478
1.85417	438.102
1.8625	441.825
1.87083	440.1
1.87917	435.057
1.8875	435.833
1.89583	437.587
1.90417	438.576
1.9125	433.555
1.92083	432.573
1.92917	432.546
1.9375	435.206
1.94583	435.536
1.95417	438.494
1.9625	437.09
1.97083	435.676
1.97917	435.226
1.9875	436.363
1.99583	435.827
2.00417	436.38
2.0125	438.738
2.02083	439.233
2.02917	439.767
2.0375	440.123
2.04583	441.356
2.05417	439.602
2.0625	437.878
2.07083	436.861
2.07917	437.064
2.0875	439.121
2.09583	438.988
2.10417	438.859
2.1125	437.292
2.12083	438.298
2.12917	436.645
2.1375	436.113
2.14583	435.246
2.15417	436.026
2.1625	436.637
2.17083	437.167
2.17917	437.065
2.1875	436.539
2.19583	436.415
2.20417	437.919
2.2125	438.353
2.22083	437.923
2.22917	438.369
2.2375	437.712
2.24583	434.522
2.25417	434.665
2.2625	437.686
2.27083	437.768
2.27917	436.556
2.2875	437.068
2.29583	435.504
2.30417	434.58
2.3125	434.956
2.32083	435.714
2.32917	433.452
2.3375	434.391
2.34583	434.285
2.35417	434.632
2.3625	434.487
2.37083	435.749
2.37917	434.984
2.3875	436.851
2.39583	438.333
2.40417	438.207
2.4125	435.648
2.42083	434.403
2.42917	433.832
2.4375	432.406
2.44583	433.229
2.45417	435.787
2.4625	436.767
2.47083	435.316
2.47917	436.412
2.4875	438.21
2.49583	437.435
2.50417	434.84
2.5125	436.147
2.52083	437.874
2.52917	439.593
2.5375	438.814
2.54583	438.5
2.55417	436.511
2.5625	435.734
2.57083	436.22
2.57917	436.682
2.5875	436.061
2.59583	435.554
2.60417	437.219
2.6125	436.182
2.62083	435.983
2.62917	437.06
2.6375	437.326
2.64583	436.051
2.65417	434.54
2.6625	436.451
2.67083	437.104
2.67917	438.885
2.6875	438.29
2.69583	437.751
2.70417	436.672
2.7125	437.383
2.72083	439.117
2.72917	438.23
2.7375	436.353
2.74583	435.158
2.75417	437.501
2.7625	437.294
2.77083	437.633
2.77917	435.476
2.7875	434.991
2.79583	432.661
2.80417	433.325
2.8125	435.036
2.82083	435.396
2.82917	433.065
2.8375	432.52
2.84583	436.21
2.85417	438.224
2.8625	437.046
2.87083	434.381
2.87917	434.294
2.8875	437.014
2.89583	435.504
2.90417	433.489
2.9125	433.08
2.92083	437.313
2.92917	436.158
2.9375	436.444
2.94583	433.557
2.95417	435.431
2.9625	433.938
2.97083	436.075
2.97917	436.842
2.9875	437.6
2.99583	436.842
3.00417	130.685
3.0125	131.102
3.02083	131.054
3.02917	131.669
3.0375	131.155
3.04583	130.261
3.05417	129.778
3.0625	131.728
3.07083	132.876
3.07917	132.617
3.0875	132.098
3.09583	133.018
3.10416	132.777
3.1125	131.104
3.12083	131.12
3.12916	132.297
3.1375	132.742
3.14583	132.406
3.15416	132.027
3.1625	131.529
3.17083	132.066
3.17916	131.736
3.1875	131.331
3.19583	130.792
3.20416	132.443
3.2125	132.952
3.22083	133.21
3.22916	131.494
3.2375	131.079
3.24583	130.912
3.25416	131.499
3.2625	131.881
3.27083	132.789
3.27916	133.844
3.2875	133.287
3.29583	131.237
3.30416	130.542
3.31249	131.013
3.32083	131.519
3.32916	131.775
3.33749	133.161
3.34583	132.984
3.35416	132.06
3.36249	131.939
3.37083	132.926
3.37916	133.062
3.38749	132.253
3.39583	131.894
3.40416	132.599
3.41249	132.901
3.42083	133.537
3.42916	133.787
3.43749	133.397
3.44583	133.249
3.45416	133.144
3.46249	133.219
3.47083	132.71
3.47916	133.737
3.48749	133.856
3.49583	133.115
3.50416	133.53
3.51249	134.853
3.52083	134.809
3.52916	133.651
3.53749	132.84
3.54582	133.508
3.55416	134.144
3.56249	133.754
3.57082	132.342
3.57916	132.018
3.58749	132.621
3.59582	132.197
3.60416	132.612
3.61249	133.202
3.62082	133.767
3.62916	132.762
3.63749	132.719
3.64582	132.959
3.65416	133.415
3.66249	132.16
3.67082	132.624
3.67916	133.779
3.68749	134.44
3.69582	133.642
3.70416	133.403
3.71249	131.816
3.72082	131.118
3.72916	132.47
3.73749	133.815
3.74582	133.452
3.75415	132.667
3.76249	131.976
3.77082	132.748
3.77915	133.556
3.78749	132.721
3.79582	131.257
3.80415	131.486
3.81249	132.227
3.82082	131.812
3.82915	132.102
3.83749	132.605
3.84582	132.972
3.85415	133.35
3.86249	134.488
3.87082	134.575
3.87915	133.533
3.88749	132.416
3.89582	132.478
3.90415	133.227
3.91249	133.899
3.92082	134.008
3.92915	133.061
3.93749	132.96
3.94582	133.41
3.95415	132.675
3.96249	132.412
3.97082	133.293
3.97915	133.949
3.98748	133.315
3.99582	133.311
4.00415	133.457
4.01248	133.226
4.02082	133.327
4.02915	133.822
4.03748	133.542
4.04582	133.011
4.05415	132.601
4.06248	132.808
4.07082	134.099
4.07915	133.877
4.08748	133.763
4.09582	133.975
4.10415	133.603
4.11248	132.146
4.12082	131.034
4.12915	131.526
4.13748	131.42
4.14582	131.534
4.15415	132.459
4.16248	133.283
4.17082	133.159
4.17915	132.129
4.18748	132.237
4.19581	132.991
4.20415	133.564
4.21248	133.06
4.22081	132.133
4.22915	131.526
4.23748	131.86
4.24581	132.567
4.25415	132.943
4.26248	131.615
4.27081	131.956
4.27915	133.415
4.28748	133.839
4.29581	132.144
4.30415	131.971
4.31248	133.293
4.32081	133.695
4.32915	132.977
4.33748	133.035
4.34581	133.417
4.35415	133.147
4.36248	131.991
4.37081	132.476
4.37915	133.5
4.38748	134.036
4.39581	132.82
4.40414	132.195
4.41248	132.127
4.42081	132.939
4.42914	132.987
4.43748	132.17
4.44581	131.81
4.45414	132.349
4.46248	133.47
4.47081	133.11
4.47914	132.894
4.48748	131.324
4.49581	131.957
4.50414	132.934
4.51248	133.806
4.52081	132.792
4.52914	132.69
4.53748	132.391
4.54581	132.041
4.55414	132.788
4.56248	133.044
4.57081	133.578
4.57914	133.365
4.58748	133.246
4.59581	132.585
4.60414	132.85
4.61248	133.241
4.62081	132.791
4.62914	132.602
4.63747	131.166
4.64581	131.711
4.65414	132.838
4.66247	133.229
4.67081	132.356
4.67914	132.143
4.68747	132.991
4.69581	132.029
4.70414	131.843
4.71247	132.861
4.72081	133.564
4.72914	133.993
4.73747	133.216
4.74581	133.316
4.75414	132.226
4.76247	132.253
4.77081	132.436
4.77914	132.401
4.78747	132.868
4.79581	133.079
4.80414	133.79
4.81247	132.851
4.82081	132.792
4.82914	132.879
4.83747	133.512
4.8458	133.363
4.85414	132.861
4.86247	131.949
4.8708	131.281
4.87914	131.832
4.88747	131.247
4.8958	130.501
4.90414	131.468
4.91247	132.566
4.9208	132.938
4.92914	131.707
4.93747	131.677
4.9458	130.886
4.95414	132.348
4.96247	133.081
4.9708	133.14
4.97914	131.416
4.98747	131.779
4.9958	131.91
5.00414	131.361
5.01247	130.729
5.0208	131.916
5.02914	132.456
5.03747	133.195
5.0458	132.346
5.05414	132.37
5.06247	131.23
5.0708	133.414
5.07913	132.961
5.08747	132.897
5.0958	131.736
5.10413	132.002
5.11247	131.969
5.1208	131.674
5.12913	131.753
5.13747	131.549
5.1458	131.5
5.15413	131.252
5.16247	131.1
5.1708	132.203
5.17913	132.844
5.18747	132.282
5.1958	131.016
5.20413	130.855
5.21247	132.584
5.2208	133.221
5.22913	133.349
5.23747	132.272
5.2458	132.68
5.25413	132.65
5.26247	133.571
5.2708	133.784
5.27913	133.294
5.28746	131.624
5.2958	132.645
5.30413	133.388
5.31246	132.676
5.3208	131.716
5.32913	133.064
5.33746	133.716
5.3458	133.161
5.35413	132.48
5.36246	131.676
5.3708	131.523
5.37913	131.544
5.38746	131.576
5.3958	131.195
5.40413	131.357
5.41246	131.548
5.4208	131.129
5.42913	131.722
5.43746	131.723
5.4458	131.805
5.45413	131.757
5.46246	132.052
5.4708	132.205
5.47913	132.514
5.48746	133.599
5.49579	133.205
5.50413	133.267
5.51246	132.155
5.52079	131.355
5.52913	130.122
5.53746	131.595
5.54579	132.107
5.55413	131.919
5.56246	131.919
5.57079	132.278
5.57913	131.825
5.58746	131.758
5.59579	131.426
5.60413	131.132
5.61246	131.128
5.62079	133.719
5.62913	132.788
5.63746	131.021
5.64579	131.105
5.65413	132.779
5.66246	132.597
5.67079	131.605
5.67913	132.08
5.68746	131.402
5.69579	131.149
5.70413	131.322
5.71246	131.488
5.72079	130.867
5.72912	131.762
5.73746	131.444
5.74579	130.547
5.75412	131.349
5.76246	132.241
5.77079	131.576
5.77912	129.874
5.78746	130.042
5.79579	130.175
5.80412	130.34
5.81246	130.394
5.82079	130.03
5.82912	129.849
5.83746	129.449
5.84579	129.767
5.85412	130.7
5.86246	130.925
5.87079	131.411
5.87912	131.688
5.88746	131.642
5.89579	130.644
5.90412	130.807
5.91246	132.43
5.92079	132.725
5.92912	131.874
5.93745	130.825
5.94579	131.046
5.95412	131.053
5.96245	132.052
5.97079	132.72
5.97912	132.436
5.98745	131.516
5.99579	130.655
6.00412	130.707
6.01245	131.242
6.02079	131.324
6.02912	130.906
6.03745	130.949
6.04579	132.039
6.05412	132.166
6.06245	131.779
6.07079	130.99
6.07912	131.758
6.08745	132.697
6.09579	132.186
6.10412	131.644
6.11245	131.2
6.12079	132.008
6.12912	131.386
6.13745	131.362
6.14579	130.524
6.15412	130.963
6.16245	130.482
6.17078	130.604
6.17912	131.329
6.18745	131.839
6.19578	131.081
6.20412	130.766
6.21245	130.605
6.22078	131.507
6.22912	132.299
6.23745	132.768
6.24578	132.293
6.25412	130.711
6.26245	129.745
6.27078	129.7
6.27912	129.966
6.28745	129.388
6.29578	129.805
6.30412	131.037
6.31245	131.416
6.32078	130.304
6.32912	129.072
6.33745	129.006
6.34578	130.178
6.35412	130.845
6.36245	130.768
6.37078	130.44
6.37911	130.562
6.38745	130.093
6.39578	130.199
6.40411	130.139
6.41245	131.229
6.42078	129.769
6.42911	128.896
6.43745	129.358
6.44578	131.102
6.45411	132.03
6.46245	131.862
6.47078	130.847
6.47911	130.03
6.48745	130.297
6.49578	130.327
6.50411	130.671
6.51245	130.776
6.52078	130.883
6.52911	130.334
6.53745	130.44
6.54578	130.314
6.55411	130.657
6.56245	130.553
6.57078	130.609
6.57911	129.639
6.58744	129.739
6.59578	129.775
6.60411	130.285
6.61244	130.121
6.62078	130.065
6.62911	130.054
6.63744	130.556
6.64578	131.086
6.65411	131.016
6.66244	131.135
6.67078	130.803
6.67911	130.826
6.68744	131.25
6.69578	131.64
6.70411	131.056
6.71244	130.552
6.72078	131.036
6.72911	130.499
6.73744	130.694
6.74578	130.414
6.75411	131.254
6.76244	130.52
6.77078	130.698
6.77911	129.768
6.78744	129.613
6.79578	130.062
6.80411	130.499
6.81244	130.237
6.82077	129.999
6.82911	130.527
6.83744	130.024
6.84577	130.407
6.85411	130.303
6.86244	130.305
6.87077	129.88
6.87911	130.748
6.88744	131.39
6.89577	131.249
6.90411	130.495
6.91244	129.207
6.92077	129.702
6.92911	129.761
6.93744	130.111
6.94577	130.014
6.95411	131.279
6.96244	130.907
6.97077	130.269
6.97911	130.083
6.98744	130.231
6.99577	130.207
7.00411	129.959
7.01244	129.948
7.02077	129.815
7.0291	129.452
7.03744	128.833
7.04577	129.65
7.0541	130.678
7.06244	130.752
7.07077	129.417
7.0791	129.384
7.08744	129.506
7.09577	130.095
7.1041	129.522
7.11244	129.817
7.12077	130.62
7.1291	131.01
7.13744	130.274
7.14577	129.373
7.1541	129.2
7.16244	129.578
7.17077	128.41
7.1791	129.134
7.18744	130.286
7.19577	130.671
7.2041	128.922
7.21244	128.988
7.22077	130.265
7.2291	130.632
7.23744	130.85
7.24577	130.233
7.2541	129.751
7.26243	129.935
7.27077	130.122
7.2791	130.615
7.28743	130.066
7.29577	129.697
7.3041	127.931
7.31243	127.774
7.32077	128.747
7.3291	130.228
7.33743	130.797
7.34577	129.759
7.3541	128.835
7.36243	128.305
7.37077	129.539
7.3791	129.903
7.38743	130.35
7.39577	129.385
7.4041	130.227
7.41243	129.611
7.42077	129.794
7.4291	128.768
7.43743	129.497
7.44577	130.287
7.4541	131.304
7.46243	130.909
7.47076	129.652
7.4791	129.961
7.48743	130.194
7.49576	129.521
7.5041	129.093
7.51243	129.961
7.52076	130.227
7.5291	129.793
7.53743	129.845
7.54576	129.797
7.5541	130.643
7.56243	131.007
7.57076	131.532
7.5791	130.795
7.58743	129.902
7.59576	128.553
7.6041	129.102
7.61243	130.101
7.62076	130.139
7.6291	130.152
7.63743	130.737
7.64576	130.239
7.6541	129.355
7.66243	129.023
7.67076	129.788
7.67909	129.841
7.68743	129.417
7.69576	129.007
7.70409	129.401
7.71243	129.726
7.72076	129.801
7.72909	129.295
7.73743	128.847
7.74576	128.574
7.75409	129.555
7.76243	129.991
7.77076	129.616
7.77909	129.234
7.78743	129.059
7.79576	129.129
7.80409	129.264
7.81243	129.393
7.82076	130.026
7.82909	130.27
7.83743	130.37
7.84576	128.978
7.85409	129.098
7.86243	128.565
7.87076	129.315
7.87909	129.213
7.88743	129.395
7.89576	129.489
7.90409	129.257
7.91242	128.918
7.92076	128.58
7.92909	129.52
7.93742	129.931
7.94576	130.184
7.95409	129.304
7.96242	128.493
7.97076	128.678
7.97909	128.249
7.98742	127.452
7.99576	127.054
8.00409	128.318
8.01242	128.091
8.02076	128.454
8.02909	128.146
8.03742	129.014
8.04576	128.521
8.05409	129.27
8.06242	129.52
8.07076	130.173
8.07909	129.181
8.08742	129.323
8.09576	129.777
8.10409	129.821
8.11242	129.101
8.12075	128.962
8.12909	128.418
8.13742	129.053
8.14575	130.902
8.15409	130.303
8.16242	128.759
8.17075	128.137
8.17909	129.813
8.18742	129.88
8.19575	129.77
8.20409	129.096
8.21242	129.568
8.22075	129.769
8.22909	129.865
8.23742	129.75
8.24575	130.226
8.25409	129.555
8.26242	129.943
8.27075	129.56
8.27909	129.343
8.28742	127.941
8.29575	127.413
8.30409	127.548
8.31242	128.23
8.32075	128.263
8.32908	128.248
8.33742	128.366
8.34575	128.74
8.35408	128.476
8.36242	128.794
8.37075	128.576
8.37908	128.981
8.38742	128.906
8.39575	128.518
8.40408	128.207
8.41242	127.862
8.42075	128.394
8.42908	128.78
8.43742	129.42
8.44575	128.314
8.45408	128.436
8.46242	129.115
8.47075	129.082
8.47908	127.958
8.48742	128.729
8.49575	129.449
8.50408	129.24
8.51242	128.72
8.52075	129.35
8.52908	129.685
8.53742	129.082
8.54575	127.896
8.55408	128.18
8.56241	128.42
8.57075	128.336
8.57908	128.365
8.58741	128.737
8.59575	129.273
8.60408	128.916
8.61241	130.935
8.62075	130.997
8.62908	130.467
8.63741	127.786
8.64575	128.301
8.65408	128.982
8.66241	128.88
8.67075	128.133
8.67908	128.639
8.68741	129.05
8.69575	128.696
8.70408	128.67
8.71241	128.503
8.72075	128.328
8.72908	128.273
8.73741	128.861
8.74575	128.157
8.75408	127.867
8.76241	127.726
8.77074	129.375
8.77908	129.893
8.78741	129.479
8.79574	128.181
8.80408	128.307
8.81241	128.649
8.82074	127.81
8.82908	128.255
8.83741	127.948
8.84574	129.12
8.85408	128.955
8.86241	130.006
8.87074	129.77
8.87908	130.388
8.88741	129.958
8.89574	128.556
8.90408	127.749
8.91241	128.26
8.92074	129.675
8.92908	128.445
8.93741	127.398
8.94574	127.72
8.95408	128.589
8.96241	127.184
8.97074	127.197
8.97908	127.98
8.98741	128.389
8.99574	128.81
9.00407	129.47
9.01241	128.63
9.02074	127.766
9.02907	128.858
9.03741	129.334
9.04574	128.339
9.05407	127.276
9.06241	127.224
9.07074	127.698
9.07907	128.402
9.08741	127.623
9.09574	128.764
9.10407	128.892
9.11241	128.69
9.12074	127.125
9.12907	128.075
9.13741	127.936
9.14574	128.108
9.15407	127.907
9.16241	127.872
9.17074	128.195
9.17907	127.801
9.18741	128.327
9.19574	128.48
9.20407	129.453
9.2124	128.448
9.22074	128.576
9.22907	128.834
9.2374	129.191
9.24574	127.722
9.25407	127.446
9.2624	127.986
9.27074	128.889
9.27907	127.964
9.2874	127.766
9.29574	128.858
9.30407	129.334
9.3124	128.339
9.32074	127.276
9.32907	127.224
9.3374	127.698
9.34574	128.402
9.35407	127.623
9.3624	128.764
9.37074	128.892
9.37907	128.69
9.3874	127.125
9.39574	128.075
9.40407	127.936
9.4124	128.108
9.42073	127.907
9.42907	127.872
9.4374	128.195
9.44573	127.801
9.45407	128.327
9.4624	128.48
9.47073	129.453
9.47907	128.448
9.4874	128.576
9.49573	128.834
9.50407	129.191
9.5124	127.722
9.52073	127.446
9.52907	127.986
9.5374	128.889
9.54573	127.964
9.55407	127.766
9.5624	128.858
9.57073	129.334
9.57907	128.339
9.5874	127.276
9.59573	127.224
9.60407	127.698
9.6124	128.402
9.62073	127.623
9.62907	128.764
9.6374	128.892
9.64573	128.69
9.65406	127.125
9.6624	128.075
9.67073	127.936
9.67906	128.108
9.6874	127.907
9.69573	127.872
9.70406	128.195
9.7124	127.801
9.72073	128.327
9.72906	128.48
9.7374	129.453
9.74573	128.448
9.75406	128.576
9.7624	128.834
9.77073	129.191
9.77906	127.722
9.7874	127.446
9.79573	127.986
9.80406	128.889
9.8124	127.964
9.82073	127.766
9.82906	128.858
9.8374	129.334
9.84573	128.339
9.85406	127.276
9.86239	127.224
9.87073	127.698
9.87906	128.402
9.88739	127.623
9.89573	128.764
9.90406	128.892
9.91239	128.69
9.92073	127.125
9.92906	128.075
9.93739	127.936
9.94573	128.108
9.95406	127.907
9.96239	127.872
9.97073	128.195
9.97906	127.801
9.98739	128.327
9.99573	128.48
10.0041	398.283
10.0124	401.996
10.0207	404.395
10.0291	405.122
10.0374	404.449
10.0457	402.943
10.0541	402.791
10.0624	403.934
10.0707	405.393
10.0791	404.821
10.0874	405.103
10.0957	404.544
10.1041	405.309
10.1124	405.448
10.1207	405.194
10.1291	405.756
10.1374	406.113
10.1457	406.452
10.1541	405.59
10.1624	407.379
10.1707	407.407
10.1791	407.972
10.1874	408.906
10.1957	407.956
10.2041	406.62
10.2124	405.953
10.2207	408.524
10.2291	409.436
10.2374	408.494
10.2457	407.216
10.2541	407.458
10.2624	408.17
10.2707	407.391
10.2791	408.404
10.2874	410.058
10.2957	410.086
10.3041	408.924
10.3124	408.529
10.3207	409.3
10.3291	408.729
10.3374	409.225
10.3457	408.333
10.3541	408.011
10.3624	408.691
10.3707	411.082
10.379	411.911
10.3874	409.7
10.3957	410.371
10.404	410.346
10.4124	409.712
10.4207	406.138
10.4291	408.856
10.4374	409.751
10.4457	410.861
10.4541	410.851
10.4624	410.248
10.4707	408.232
10.4791	408.454
10.4874	410
10.4957	410.764
10.504	412.824
10.5124	413.468
10.5207	411.851
10.529	409.916
10.5374	409.705
10.5457	409.23
10.5541	410.177
10.5624	410.25
10.5707	408.2
10.5791	405.421
10.5874	407.857
10.5957	410.971
10.6041	411.357
10.6124	410.131
10.6207	410.384
10.629	410.525
10.6374	409.105
10.6457	410.091
10.654	410.854
10.6624	413.391
10.6707	412.659
10.6791	412.123
10.6874	413.538
10.6957	414.578
10.7041	414.707
10.7124	414.741
10.7207	414.32
10.7291	411.271
10.7374	410.411
10.7457	411.19
10.754	411.938
10.7624	412.918
10.7707	411.969
10.779	410.189
10.7874	410.786
10.7957	410.743
10.8041	410.381
10.8124	411.733
10.8207	413.39
10.8291	412.154
10.8374	411.882
10.8457	411.882
10.8541	411.657
10.8624	412.955
10.8707	413.627
10.879	412.978
10.8874	413.505
10.8957	412.97
10.904	412.658
10.9124	411.567
10.9207	412.475
10.9291	411.446
10.9374	412.456
10.9457	411.967
10.954	410.25
10.9624	409.484
10.9707	410.014
10.979	412.24
10.9874	413.402
10.9957	414.63
11.004	411.579
11.0124	410.519
11.0207	410.363
11.029	411.19
11.0374	411.389
11.0457	411.104
11.054	411.064
11.0624	410.387
11.0707	411.66
11.079	412.8
11.0874	413.267
11.0957	412.171
11.104	410.053
11.1124	411.728
11.1207	415.089
11.129	415.596
11.1374	412.137
11.1457	412.44
11.154	413.684
11.1624	413.472
11.1707	410.512
11.179	411.744
11.1874	412.464
11.1957	413.982
11.204	411.785
11.2124	413.93
11.2207	414.634
11.229	414.974
11.2374	412.852
11.2457	412.816
11.254	412.757
11.2624	410.929
11.2707	410.653
11.279	410.976
11.2874	410.841
11.2957	409.95
11.304	410.741
11.3124	414.983
11.3207	414.452
11.329	413.144
11.3374	411.474
11.3457	414.3
11.354	413.859
11.3624	413.076
11.3707	411.829
11.379	412.244
11.3874	413.366
11.3957	413.928
11.404	412.93
11.4124	413.242
11.4207	414.681
11.429	415.021
11.4374	414.81
11.4457	415.195
11.454	415.02
11.4624	415.233
11.4707	415.274
11.479	414.874
11.4874	414.369
11.4957	414.512
11.504	413.136
11.5124	412.702
11.5207	415.699
11.529	416.98
11.5374	415.594
11.5457	413.73
11.554	415.497
11.5624	413.669
11.5707	411.867
11.579	413.682
11.5874	416.823
11.5957	416.191
11.604	415.089
11.6124	416.778
11.6207	414.374
11.629	413.089
11.6374	410.686
11.6457	411.329
11.654	410.895
11.6624	412.953
11.6707	414.887
11.679	414.52
11.6874	415.589
11.6957	414.746
11.704	414.99
11.7124	413.777
11.7207	414.427
11.729	413.747
11.7374	413.998
11.7457	413.809
11.754	413.929
11.7624	413.449
11.7707	414.715
11.779	413.89
11.7874	413.502
11.7957	413.877
11.804	414.645
11.8124	414.004
11.8207	414.01
11.829	413.16
11.8374	412.295
11.8457	412.385
11.854	413.935
11.8624	413.878
11.8707	413.423
11.879	413.75
11.8874	415.706
11.8957	416.459
11.904	414.365
11.9124	413.68
11.9207	414.893
11.929	414.87
11.9374	413.529
11.9457	413.92
11.954	414.941
11.9624	414.718
11.9707	414.877
11.979	414.1
11.9874	414.837
11.9957	413.536
12.004	413.11
12.0124	412.612
12.0207	414.896
12.029	416.333
12.0374	416.689
12.0457	414.02
12.054	412.247
12.0624	411.815
12.0707	414.45
12.079	414.355
12.0874	413.538
12.0957	413.175
12.104	415.058
12.1124	413.094
12.1207	410.85
12.129	412.174
12.1374	414.038
12.1457	413.912
12.154	412.657
12.1624	414.148
12.1707	416.639
12.179	417.534
12.1874	415.936
12.1957	413.205
12.204	414.28
12.2124	413.92
12.2207	415.55
12.229	414.058
12.2374	415.362
12.2457	413.566
12.254	413.49
12.2624	413.538
12.2707	415.66
12.279	414.156
12.2874	412.801
12.2957	413.231
12.304	414.265
12.3124	413.015
12.3207	412.12
12.329	411.553
12.3374	412.54
12.3457	413.797
12.354	414.103
12.3624	414.466
12.3707	414.071
12.379	415.768
12.3874	415.544
12.3957	415.738
12.404	414.398
12.4124	414.667
12.4207	415.001
12.429	415.464
12.4374	415.407
12.4457	415.552
12.454	413.75
12.4624	414.127
12.4707	413.552
12.479	412.98
12.4873	412.754
12.4957	414.017
12.504	415.819
12.5123	415.687
12.5207	416.495
12.529	416.255
12.5373	413.106
12.5457	411.576
12.554	413.869
12.5624	416.044
12.5707	413.337
12.579	411.315
12.5874	410.89
12.5957	411.298
12.604	410.794
12.6123	411.14
12.6207	412.115
12.629	414.647
12.6373	415.333
12.6457	416.793
12.654	416.974
12.6623	414.036
12.6707	412.457
12.679	412.555
12.6874	413.524
12.6957	412.558
12.704	413.245
12.7124	413.08
12.7207	412.938
12.729	411.823
12.7373	411.79
12.7457	412.674
12.754	414.554
12.7623	414.941
12.7707	413.737
12.779	412.229
12.7873	412.354
12.7957	415.228
12.804	416.785
12.8124	417.057
12.8207	416.043
12.829	414.652
12.8374	414.668
12.8457	416.206
12.854	415.938
12.8623	413.064
12.8707	412.712
12.879	416.049
12.8873	416.223
12.8957	415.161
12.904	414.713
12.9123	416.214
12.9207	415.585
12.929	415.026
12.9374	414.994
12.9457	417.377
12.954	416.284
12.9624	414.526
12.9707	413.129
12.979	414.562
12.9873	414.314
12.9957	414.216
13.004	413.583
13.0123	412.753
13.0207	413.998
13.029	415.93
13.0373	414.426
13.0457	413.858
13.054	414.754
13.0624	414.253
13.0707	413.727
13.079	415.526
13.0874	416.228
13.0957	414.695
13.104	416.085
13.1123	416.281
13.1207	414.518
13.129	414
13.1373	414.205
13.1457	415.333
13.154	413.677
13.1623	412.66
13.1707	412.347
13.179	413.41
13.1873	412.82
13.1957	410.775
13.204	410.963
13.2123	412.171
13.2207	415.253
13.229	415.091
13.2373	414.959
13.2457	414
13.254	414.489
13.2623	413.25
13.2707	413.32
13.279	412.877
13.2873	414.564
13.2957	414.263
13.304	412.908
13.3123	412.792
13.3207	414.045
13.329	414.059
13.3373	414.383
13.3457	414.912
13.354	411.282
13.3623	411.287
13.3707	414.082
13.379	417.224
13.3873	414.608
13.3957	412.176
13.404	410.775
13.4123	413.228
13.4207	415.468
13.429	413.881
13.4373	413.001
13.4457	413.431
13.454	415.828
13.4623	414.891
13.4707	414.793
13.479	413.533
13.4873	413.269
13.4957	413.138
13.504	414.101
13.5123	413.681
13.5207	412.575
13.529	411.702
13.5373	413.597
13.5457	413.85
13.554	413.155
13.5623	413.419
13.5707	414.138
13.579	413.348
13.5873	411.628
13.5957	414.242
13.604	414.158
13.6123	413.839
13.6207	412.725
13.629	413.867
13.6373	412.405
13.6457	413.425
13.654	414.889
13.6623	415.677
13.6707	411.886
13.679	410.102
13.6873	410.257
13.6957	412.048
13.704	412.496
13.7123	413.484
13.7207	414.227
13.729	412.227
13.7373	412.953
13.7457	414.519
13.754	415.123
13.7623	412.532
13.7707	413.098
13.779	412.919
13.7873	414.977
13.7957	415.134
13.804	414.814
13.8123	413.687
13.8207	414.376
13.829	415.349
13.8373	416.14
13.8457	415.481
13.854	412.054
13.8623	412.133
13.8707	411.89
13.879	413.42
13.8873	413.937
13.8957	414.002
13.904	411.526
13.9123	411.351
13.9207	412.05
13.929	411.875
13.9373	412.715
13.9457	413.172
13.954	413.054
13.9623	413.668
13.9707	412.361
13.979	411.774
13.9873	410.825
13.9957	412.663
14.004	410.995
14.0123	410.331
14.0207	410.59
14.029	412.235
14.0373	414.047
14.0457	414.468
14.054	414.29
14.0623	413.802
14.0707	412.464
14.079	412.149
14.0873	411.517
14.0957	414.35
14.104	414.585
14.1123	415.279
14.1207	413.194
14.129	411.508
14.1373	411.419
14.1457	415.636
14.154	417.856
14.1623	414.127
14.1707	409.539
14.179	410.572
14.1873	411.983
14.1957	413.334
14.204	412.162
14.2123	412.926
14.2207	413.039
14.229	413.796
14.2373	413.478
14.2457	412.875
14.254	413.235
14.2623	412.487
14.2707	413.27
14.279	413.66
14.2873	414.702
14.2957	413.751
14.304	411.173
14.3123	411.113
14.3207	414.144
14.329	416.021
14.3373	414.161
14.3457	413.023
14.354	414.436
14.3623	413.221
14.3707	413.203
14.379	413.756
14.3873	415.86
14.3957	414.274
14.404	415.227
14.4123	414.271
14.4207	415.113
14.429	413.452
14.4373	414.196
14.4457	412.3
14.454	412.139
14.4623	410.729
14.4707	413.123
14.479	413.743
14.4873	414.077
14.4957	413.702
14.504	413.956
14.5123	414.783
14.5207	413.902
14.529	414.105
14.5373	412.46
14.5457	414.106
14.554	412.704
14.5623	413.113
14.5707	412.429
14.579	416.369
14.5873	414.784
14.5957	411.468
14.604	410.574
14.6123	412.658
14.6207	413.333
14.629	412.468
14.6373	413.072
14.6457	411.554
14.654	411.605
14.6623	412.201
14.6707	412.739
14.679	412.471
14.6873	412.804
14.6957	414.003
14.704	415.448
14.7123	415.083
14.7206	413.925
14.729	413.345
14.7373	414.194
14.7456	412.586
14.754	413.855
14.7623	415.177
14.7706	416.271
14.779	411.589
14.7873	411.901
14.7957	413.294
14.804	414.296
14.8123	412.214
14.8207	412.145
14.829	412.225
14.8373	413.413
14.8456	413.624
14.854	413.517
14.8623	413.27
14.8706	413.59
14.879	414.536
14.8873	414.112
14.8956	413.597
14.904	412.322
14.9123	411.896
14.9207	412.304
14.929	414.249
14.9373	414.707
14.9457	412.851
14.954	414.396
14.9623	415.875
14.9706	416.629
14.979	416.593
14.9873	415.004
14.9956	412.801
15.004	411.263
15.0123	412.561
15.0206	413.198
15.029	415.237
15.0373	416.064
15.0457	414.223
15.054	413.608
15.0623	413.331
15.0707	413.712
15.079	411.633
15.0873	412.158
15.0956	415.179
15.104	416.982
15.1123	416.103
15.1206	416.622
15.129	416.245
15.1373	415.18
15.1456	413.559
15.154	414.005
15.1623	413.919
15.1707	413.321
15.179	412.605
15.1873	411.288
15.1957	413.008
15.204	412.902
15.2123	413.041
15.2206	411.13
15.229	412.817
15.2373	413.597
15.2456	412.298
15.254	412.112
15.2623	415.775
15.2706	416.595
15.279	414.06
15.2873	413.435
15.2957	413.198
15.304	411.862
15.3123	410.702
15.3207	411.861
15.329	411.826
15.3373	413.999
15.3456	414.255
15.354	415.738
15.3623	416.387
15.3706	416.355
15.379	415.188
15.3873	412.529
15.3956	411.6
15.404	412.395
15.4123	413.595
15.4207	412.227
15.429	413.298
15.4373	416.002
15.4457	415.171
15.454	413.285
15.4623	413.377
15.4707	413.059
15.479	413.467
15.4873	414.732
15.4957	414.331
15.504	412.162
15.5123	413.145
15.5207	414.453
15.529	413.679
15.5373	413.548
15.5457	413.489
15.554	413.562
15.5623	412.972
15.5707	412.868
15.579	411.097
15.5873	412.916
15.5957	413.27
15.604	414.001
15.6123	412.086
15.6207	414.609
15.629	413.896
15.6373	413.501
15.6457	411.853
15.654	413.011
15.6623	412.655
15.6707	413.868
15.679	414.989
15.6873	415.327
15.6957	414.032
15.704	414.776
15.7123	413.36
15.7207	411.576
15.729	411.19
15.7373	412.677
15.7457	412.639
15.754	412.197
15.7623	410.342
15.7707	410.519
15.779	411.824
15.7873	413.689
15.7957	413.381
15.804	413.608
15.8123	414.945
15.8207	414.227
15.829	413.732
15.8373	412.439
15.8457	413.297
15.854	412.581
15.8623	413.286
15.8707	413.636
15.879	413.14
15.8873	411.853
15.8957	411.827
15.904	412.549
15.9123	415.493
15.9207	415.643
15.929	414.643
15.9373	411.059
15.9457	411.778
15.954	412.981
15.9623	415.248
15.9707	413.73
15.979	413.797
15.9873	413.837
15.9957	414.132
16.004	413.538
16.0123	412.916
16.0207	412.447
16.029	411.177
16.0373	411.144
16.0457	413.862
16.054	416.87
16.0623	417.004
16.0707	414.135
16.079	413.455
16.0873	412.062
16.0957	412.642
16.104	412.51
16.1123	412.72
16.1207	412.666
16.129	413.593
16.1373	413.843
16.1457	413.086
16.154	413.418
16.1623	413.465
16.1707	413.715
16.179	413.654
16.1873	414.243
16.1957	413.361
16.204	411.497
16.2123	410.708
16.2207	411.334
16.229	411.094
16.2373	410.629
16.2457	410.244
16.254	412.08
16.2623	413.744
16.2707	412.982
16.279	413.053
16.2873	412.201
16.2957	411.541
16.304	411.353
16.3123	413.669
16.3207	413.387
16.329	411.648
16.3373	410.85
16.3457	412.555
16.354	412.584
16.3623	413.551
16.3707	411.665
16.379	412.001
16.3873	410.827
16.3957	413.421
16.404	412.447
16.4123	411.954
16.4207	410.078
16.429	412.923
16.4373	413.729
16.4457	414.433
16.454	412.71
16.4623	413.843
16.4707	412.235
16.479	411.672
16.4873	411.911
16.4957	413.656
16.504	412.343
16.5123	410.538
16.5207	409.414
16.529	410.473
16.5373	411.935
16.5457	414.668
16.554	414.936
16.5623	413.893
16.5707	410.739
16.579	410.734
16.5873	411.242
16.5957	411.559
16.604	410.48
16.6123	411.379
16.6207	413.588
16.629	414.7
16.6373	413.287
16.6457	413.167
16.654	413.476
16.6623	414.238
16.6707	414.684
[truncated: 2,800 more rows]

## Sheet: Figure 4D Sc-1
Time (min)	F (a.u)
0.02083	540.392
0.02917	540.045
0.0375	539.333
0.04583	542.624
0.05417	543.027
0.0625	540.274
0.07083	539.196
0.07917	543.733
0.0875	542.71
0.09583	540.306
0.10417	541.531
0.1125	544.453
0.12083	544.636
0.12917	542.126
0.1375	540.77
0.14583	539.857
0.15417	542.029
0.1625	541.964
0.17083	543.95
0.17917	543.213
0.1875	541.924
0.19583	539.007
0.20417	541.667
0.2125	542.643
0.22083	542.393
0.22917	542.761
0.2375	541.984
0.24583	541.461
0.25417	540.472
0.2625	539.893
0.27083	538.705
0.27917	539.233
0.2875	538.261
0.29583	535.628
0.30417	537.048
0.3125	538.257
0.32083	540.919
0.32917	543.185
0.3375	544.949
0.34583	539.958
0.35417	539.287
0.3625	539.361
0.37083	540.725
0.37917	542.514
0.3875	544.45
0.39583	543.813
0.40417	541.588
0.4125	543.103
0.42083	539.123
0.42917	536.36
0.4375	535.283
0.44583	538.919
0.45417	539.956
0.4625	541.047
0.47083	541.8
0.47917	542.298
0.4875	542.703
0.49583	541.412
0.50417	540.104
0.5125	540.202
0.52083	540.082
0.52917	541.115
0.5375	539.614
0.54583	539.464
0.55417	536.835
0.5625	536.881
0.57083	539.71
0.57917	542.041
0.5875	540.564
0.59583	539.676
0.60417	542.741
0.6125	541.587
0.62083	539.806
0.62917	540.096
0.6375	542.274
0.64583	538.443
0.65417	537.641
0.6625	536.966
0.67083	538.071
0.67917	536.108
0.6875	539.346
0.69583	541.374
0.70417	540.609
0.7125	537.069
0.72083	538.294
0.72917	538.702
0.7375	540.435
0.74583	541.309
0.75417	541.444
0.7625	539.58
0.77083	540.66
0.77917	540.282
0.7875	538.809
0.79583	539.145
0.80417	540.724
0.8125	539.326
0.82083	538.206
0.82917	538.359
0.8375	537.088
0.84583	537.746
0.85417	538.751
0.8625	540.477
0.87083	538.699
0.87917	537.672
0.8875	538.235
0.89583	536.639
0.90417	536.522
0.9125	537.017
0.92083	537.307
0.92917	535.28
0.9375	537.095
0.94583	540.791
0.95417	541.367
0.9625	543.645
0.97083	541.37
0.97917	539.746
0.9875	537.32
0.99583	541.54
1.00417	539.259
1.0125	539.372
1.02083	537.233
1.02917	540.436
1.0375	541.39
1.04583	542.999
1.05417	540.502
1.0625	538.319
1.07083	537.508
1.07917	538.785
1.0875	540.558
1.09583	541.695
1.10417	542.862
1.1125	541.198
1.12083	540.126
1.12917	539.613
1.1375	540.056
1.14583	538.1
1.15417	538.209
1.1625	540.042
1.17083	539.959
1.17917	539.894
1.1875	540.982
1.19583	543.047
1.20417	542.505
1.2125	541.371
1.22083	539.639
1.22917	537.057
1.2375	537.426
1.24583	540.699
1.25417	542.852
1.2625	541.988
1.27083	539.055
1.27917	538.909
1.2875	539.953
1.29583	541.625
1.30417	539.926
1.3125	536.4
1.32083	536.207
1.32917	538.64
1.3375	543.12
1.34583	544.562
1.35417	543.515
1.3625	542.713
1.37083	544.256
1.37917	542.874
1.3875	539.184
1.39583	540.109
1.40417	541.78
1.4125	539.132
1.42083	536.358
1.42917	537.088
1.4375	540.142
1.44583	540.082
1.45417	542.345
1.4625	540.997
1.47083	539.965
1.47917	538.992
1.4875	542.375
1.49583	542.364
1.50417	541.085
1.5125	537.792
1.52083	539.954
1.52917	541.998
1.5375	541.9
1.54583	539.361
1.55417	540.491
1.5625	541.553
1.57083	538.009
1.57917	539.955
1.5875	543.187
1.59583	543.893
1.60417	539.978
1.6125	539.694
1.62083	542.522
1.62917	543.012
1.6375	542.87
1.64583	541.563
1.65417	540.723
1.6625	539.19
1.67083	537.967
1.67917	536.888
1.6875	538.171
1.69583	543.548
1.70417	543.955
1.7125	542.514
1.72083	539.747
1.72917	538.193
1.7375	537.39
1.74583	537.042
1.75417	537.727
1.7625	536.01
1.77083	538.994
1.77917	542.027
1.7875	544.217
1.79583	543.443
1.80417	540.486
1.8125	540.739
1.82083	539.451
1.82917	538.502
1.8375	536.297
1.84583	539.145
1.85417	542.978
1.8625	542.028
1.87083	538.67
1.87917	538.514
1.8875	538.812
1.89583	536.813
1.90417	537.717
1.9125	541.784
1.92083	539.727
1.92917	536.019
1.9375	535.917
1.94583	539.699
1.95417	540.35
1.9625	540.509
1.97083	540.711
1.97917	540.335
1.9875	540.936
1.99583	538.503
2.00417	534.292
2.0125	535.109
2.02083	538.423
2.02917	539.787
2.0375	536.736
2.04583	540.134
2.05417	540.834
2.0625	538.081
2.07083	536.977
2.07917	539.43
2.0875	542.63
2.09583	541.121
2.10417	543.805
2.1125	542.833
2.12083	541.117
2.12917	538.556
2.1375	536.54
2.14583	535.733
2.15417	536.949
2.1625	539.854
2.17083	539.024
2.17917	538.427
2.1875	536.534
2.19583	535.507
2.20417	537.569
2.2125	539.008
2.22083	536.933
2.22917	537.916
2.2375	538.747
2.24583	539.351
2.25417	537.689
2.2625	537.605
2.27083	534.151
2.27917	535.828
2.2875	539.588
2.29583	541.395
2.30417	539.26
2.3125	539.967
2.32083	538.538
2.32917	537.686
2.3375	535.734
2.34583	538.062
2.35417	536.448
2.3625	536.952
2.37083	536.103
2.37917	536.229
2.3875	535.096
2.39583	537.413
2.40417	540.189
2.4125	540.539
2.42083	538.12
2.42917	538.712
2.4375	539.623
2.44583	539.14
2.45417	535.669
2.4625	535.966
2.47083	537.49
2.47917	536.005
2.4875	537.367
2.49583	539.149
2.50417	539.279
2.5125	538.478
2.52083	539.673
2.52917	541.077
2.5375	540.617
2.54583	539.418
2.55417	537.986
2.5625	536.392
2.57083	537.121
2.57917	535.857
2.5875	537.374
2.59583	535.857
2.60417	537.156
2.6125	535.953
2.62083	536.385
2.62917	538.699
2.6375	540.844
2.64583	540.308
2.65417	540.217
2.6625	542.383
2.67083	538.507
2.67917	536.014
2.6875	537.498
2.69583	538.136
2.70417	535.639
2.7125	534.181
2.72083	535.443
2.72917	534.467
2.7375	533.495
2.74583	535.017
2.75417	536.194
2.7625	538.448
2.77083	538.173
2.77917	537.286
2.7875	534.181
2.79583	534.805
2.80417	538.21
2.8125	539.152
2.82083	537.87
2.82917	535.002
2.8375	536.281
2.84583	536.544
2.85417	537.017
2.8625	536.146
2.87083	536.453
2.87917	536.284
2.8875	538.102
2.89583	537.457
2.90417	537.916
2.9125	537.172
2.92083	538.009
2.92917	535.756
2.9375	536.198
2.94583	538.469
2.95417	539.909
2.9625	540.719
2.97083	538.131
2.97917	536.315
2.9875	535.188
2.99583	535.726
3.00417	169.744
3.0125	173.024
3.02083	173.796
3.02917	169.842
3.0375	166.449
3.04583	165.953
3.05417	168.478
3.0625	168.677
3.07083	167.814
3.07917	167.267
3.0875	166.633
3.09583	166.493
3.10416	167.657
3.1125	167.047
3.12083	166.979
3.12916	166.61
3.1375	168.141
3.14583	166.001
3.15416	165.752
3.1625	164.712
3.17083	165.524
3.17916	166.276
3.1875	167.624
3.19583	167.95
3.20416	167.744
3.2125	168.24
3.22083	168.136
3.22916	166.536
3.2375	166.449
3.24583	166.758
3.25416	166.111
3.2625	165.087
3.27083	164.738
3.27916	165.953
3.2875	165.105
3.29583	165.95
3.30416	166.132
3.31249	166.684
3.32083	164.955
3.32916	164.633
3.33749	166.006
3.34583	167.492
3.35416	165.834
3.36249	165.538
3.37083	165.512
3.37916	165.923
3.38749	165.968
3.39583	165.339
3.40416	164.755
3.41249	163.757
3.42083	165.286
3.42916	165.388
3.43749	164.697
3.44583	163.401
3.45416	162.925
3.46249	163.422
3.47083	163.769
3.47916	165.336
3.48749	166.793
3.49583	166.155
3.50416	164.829
3.51249	165.171
3.52083	167.529
3.52916	167.177
3.53749	167.296
3.54582	167.124
3.55416	166.873
3.56249	164.963
3.57082	163.219
3.57916	164.166
3.58749	164.855
3.59582	164.88
3.60416	165.168
3.61249	166.851
3.62082	165.953
3.62916	163.63
3.63749	164.779
3.64582	166.746
3.65416	166.551
3.66249	165.568
3.67082	164.799
3.67916	166.212
3.68749	166.822
3.69582	166.726
3.70416	165.443
3.71249	166.092
3.72082	165.532
3.72916	163.309
3.73749	162.896
3.74582	163.284
3.75415	164.952
3.76249	165.06
3.77082	165.859
3.77915	165.735
3.78749	166.035
3.79582	167.109
3.80415	166.531
3.81249	165.803
3.82082	164.691
3.82915	165.089
3.83749	164.768
3.84582	165.268
3.85415	164.569
3.86249	164.519
3.87082	164.61
3.87915	164.855
3.88749	164.316
3.89582	164.218
3.90415	164.36
3.91249	164.778
3.92082	164.07
3.92915	163.447
3.93749	164.897
3.94582	167.132
3.95415	166.356
3.96249	164.759
3.97082	164.001
3.97915	164.836
3.98748	164.843
3.99582	164.311
4.00415	163.328
4.01248	164.215
4.02082	165.624
4.02915	165.104
4.03748	163.885
4.04582	162.421
4.05415	163.804
4.06248	164.201
4.07082	166.021
4.07915	165.773
4.08748	165.315
4.09582	163.467
4.10415	162.94
4.11248	162.525
4.12082	163.143
4.12915	163.993
4.13748	164.271
4.14582	164.268
4.15415	163.909
4.16248	164.451
4.17082	164.746
4.17915	165.265
4.18748	164.198
4.19581	164.527
4.20415	164.411
4.21248	163.6
4.22081	162.346
4.22915	162.978
4.23748	164.018
4.24581	164.036
4.25415	165.259
4.26248	164.631
4.27081	164.513
4.27915	164.073
4.28748	165.245
4.29581	164.267
4.30415	164.493
4.31248	163.917
4.32081	164.331
4.32915	165.422
4.33748	164.559
4.34581	163.609
4.35415	163.066
4.36248	163.098
4.37081	161.974
4.37915	162.668
4.38748	163.564
4.39581	163.574
4.40414	163.802
4.41248	164.04
4.42081	164.443
4.42914	163.589
4.43748	162.957
4.44581	162.343
4.45414	162.165
4.46248	161.966
4.47081	162
4.47914	162.662
4.48748	162.348
4.49581	161.677
4.50414	162.007
4.51248	163.87
4.52081	162.507
4.52914	161.853
4.53748	163.124
4.54581	163.511
4.55414	161.417
4.56248	161.894
4.57081	163.512
4.57914	164.059
4.58748	164.323
4.59581	164.172
4.60414	164.452
4.61248	163.857
4.62081	163.635
4.62914	163.418
4.63747	163.55
4.64581	162.784
4.65414	163.733
4.66247	164.538
4.67081	164.589
4.67914	164.078
4.68747	165.014
4.69581	164.677
4.70414	164.353
4.71247	163.382
4.72081	162.955
4.72914	163.283
4.73747	164.313
4.74581	164.648
4.75414	164.425
4.76247	163.496
4.77081	162.43
4.77914	162.282
4.78747	162.854
4.79581	162.321
4.80414	162.421
4.81247	162.188
4.82081	162.238
4.82914	162.288
4.83747	163.569
4.8458	163.996
4.85414	164.282
4.86247	162.904
4.8708	161.621
4.87914	162.191
4.88747	163.049
4.8958	163.212
4.90414	162.83
4.91247	164.588
4.9208	164.9
4.92914	165.074
4.93747	162.526
4.9458	161.915
4.95414	163.339
4.96247	163.099
4.9708	162.381
4.97914	161.089
4.98747	162.707
4.9958	161.417
5.00414	162.79
5.01247	162.211
5.0208	163.139
5.02914	163.343
5.03747	165.233
5.0458	164.618
5.05414	162.187
5.06247	160.183
5.0708	161.258
5.07913	163.353
5.08747	164.16
5.0958	162.953
5.10413	161.705
5.11247	159.99
5.1208	160.735
5.12913	162.343
5.13747	163.389
5.1458	162.102
5.15413	161.338
5.16247	162.177
5.1708	163.222
5.17913	163.521
5.18747	163.089
5.1958	163.195
5.20413	163.371
5.21247	163.26
5.2208	162.442
5.22913	161.153
5.23747	162.262
5.2458	163.269
5.25413	163.794
5.26247	163.352
5.2708	162.93
5.27913	162.28
5.28746	163.496
5.2958	164.676
5.30413	162.204
5.31246	160.285
5.3208	162.406
5.32913	164.567
5.33746	163.796
5.3458	162.598
5.35413	161.895
5.36246	161.752
5.3708	163.54
5.37913	164.044
5.38746	162.723
5.3958	161.557
5.40413	161.272
5.41246	160.494
5.4208	160.381
5.42913	160.791
5.43746	161.669
5.4458	163.185
5.45413	163.142
5.46246	161.514
5.4708	162.398
5.47913	164.118
5.48746	163.698
5.49579	161.98
5.50413	161.352
5.51246	161.793
5.52079	162.973
5.52913	163.441
5.53746	162.826
5.54579	161.689
5.55413	162.479
5.56246	163.605
5.57079	162.83
5.57913	161.985
5.58746	161.689
5.59579	162.252
5.60413	161.302
5.61246	161.164
5.62079	161.561
5.62913	162.364
5.63746	163.245
5.64579	162.96
5.65413	163.081
5.66246	162.67
5.67079	163.206
5.67913	162.034
5.68746	162.815
5.69579	161.5
5.70413	161.958
5.71246	161.871
5.72079	162.703
5.72912	162.231
5.73746	162.23
5.74579	162.418
5.75412	162.427
5.76246	162.53
5.77079	162.128
5.77912	162.14
5.78746	162.223
5.79579	161.442
5.80412	161.075
5.81246	160.957
5.82079	160.733
5.82912	160.945
5.83746	161.653
5.84579	161.796
5.85412	161.565
5.86246	163.847
5.87079	163.856
5.87912	162.48
5.88746	161.731
5.89579	163.817
5.90412	163.848
5.91246	162.396
5.92079	162.925
5.92912	162.454
5.93745	162.535
5.94579	161.734
5.95412	161.658
5.96245	161.45
5.97079	161.541
5.97912	160.107
5.98745	158.888
5.99579	160.322
6.00412	162.045
6.01245	162.999
6.02079	162.259
6.02912	162.237
6.03745	161.916
6.04579	161.745
6.05412	159.769
6.06245	160.608
6.07079	160.395
6.07912	160.598
6.08745	161.187
6.09579	161.691
6.10412	160.843
6.11245	159.474
6.12079	159.766
6.12912	160.338
6.13745	160.457
6.14579	159.265
6.15412	158.651
6.16245	161.222
6.17078	162.178
6.17912	161.283
6.18745	161.032
6.19578	161.646
6.20412	162.491
6.21245	162.84
6.22078	163.274
6.22912	162.197
6.23745	161.465
6.24578	161.788
6.25412	161.128
6.26245	160.904
6.27078	160.213
6.27912	160.584
6.28745	161.204
6.29578	162.722
6.30412	162.134
6.31245	161.493
6.32078	160.702
6.32912	160.81
6.33745	160.4
6.34578	161.742
6.35412	161.466
6.36245	161.633
6.37078	161.733
6.37911	163.536
6.38745	163.328
6.39578	163.224
6.40411	161.92
6.41245	160.241
6.42078	160.609
6.42911	161.696
6.43745	162.639
6.44578	161.023
6.45411	162.062
6.46245	161.814
6.47078	161.601
6.47911	160.733
6.48745	160.738
6.49578	160.97
6.50411	161.176
6.51245	161.445
6.52078	159.722
6.52911	160.841
6.53745	160.746
6.54578	160.748
6.55411	159.826
6.56245	162.177
6.57078	162.642
6.57911	163.717
6.58744	161.012
6.59578	158.068
6.60411	158.534
6.61244	162.312
6.62078	163.448
6.62911	163
6.63744	162.803
6.64578	161.257
6.65411	160.782
6.66244	161.363
6.67078	161.784
6.67911	161.844
6.68744	162.709
6.69578	163.183
6.70411	162.005
6.71244	162.117
6.72078	160.923
6.72911	160.022
6.73744	159.094
6.74578	160.36
6.75411	161.842
6.76244	163.529
6.77078	163.414
6.77911	162.57
6.78744	162.266
6.79578	162.412
6.80411	161.417
6.81244	160.878
6.82077	162.396
6.82911	162.839
6.83744	162.8
6.84577	161.631
6.85411	160.891
6.86244	159.323
6.87077	160.424
6.87911	161.94
6.88744	162.181
6.89577	160.51
6.90411	159.46
6.91244	160.883
6.92077	163.175
6.92911	163.39
6.93744	162.771
6.94577	163.549
6.95411	163.359
6.96244	162.719
6.97077	162.1
6.97911	161.639
6.98744	161.133
6.99577	161.606
7.00411	161.706
7.01244	159.812
7.02077	160.043
7.0291	160.878
7.03744	161.056
7.04577	159.386
7.0541	159.822
7.06244	161.836
7.07077	161.603
7.0791	161.588
7.08744	160.537
7.09577	161.499
7.1041	160.466
7.11244	160.346
7.12077	159.772
7.1291	159.283
7.13744	159.494
7.14577	161.402
7.1541	163.988
7.16244	162.861
7.17077	161.855
7.1791	161.104
7.18744	162.229
7.19577	161.171
7.2041	160.954
7.21244	160.366
7.22077	161.04
7.2291	160.279
7.23744	161.683
7.24577	162.388
7.2541	162.255
7.26243	160.238
7.27077	160.484
7.2791	160.816
7.28743	161.597
7.29577	160.161
7.3041	160.316
7.31243	160.447
7.32077	160.468
7.3291	159.79
7.33743	161.246
7.34577	161.668
7.3541	161.104
7.36243	160.464
7.37077	160.304
7.3791	161.055
7.38743	161.451
7.39577	161.08
7.4041	160.322
7.41243	161.394
7.42077	161.261
7.4291	160.834
7.43743	161.092
7.44577	161.902
7.4541	160.555
7.46243	160.227
7.47076	161.302
7.4791	163.047
7.48743	162.72
7.49576	161.168
7.5041	158.861
7.51243	158.371
7.52076	159.207
7.5291	159.947
7.53743	161.537
7.54576	162.504
7.5541	162.426
7.56243	160.451
7.57076	159.667
7.5791	159.403
7.58743	159.782
7.59576	162.113
7.6041	162.575
7.61243	162.364
7.62076	160.967
7.6291	161.22
7.63743	161.33
7.64576	162.223
7.6541	162.547
7.66243	161.743
7.67076	161.329
7.67909	160.819
7.68743	160.257
7.69576	160.455
7.70409	160.786
7.71243	160.734
7.72076	159.574
7.72909	160.418
7.73743	161.555
7.74576	161.641
7.75409	160.091
7.76243	161.369
7.77076	162.32
7.77909	162.153
7.78743	160.271
7.79576	160.325
7.80409	159.823
7.81243	160.378
7.82076	161.754
7.82909	160.861
7.83743	159.591
7.84576	158.83
7.85409	161.211
7.86243	160.549
7.87076	161.024
7.87909	159.729
7.88743	159.636
7.89576	158.372
7.90409	158.772
7.91242	159.022
7.92076	160.919
7.92909	161.635
7.93742	160.21
7.94576	159.957
7.95409	160.142
7.96242	160.836
7.97076	159.849
7.97909	160.287
7.98742	161.278
7.99576	161.291
8.00409	161.201
8.01242	206.763
8.02076	205.854
8.02909	205.576
8.03742	203.268
8.04576	202.975
8.05409	202.102
8.06242	204.383
8.07076	204.942
8.07909	204.968
8.08742	202.819
8.09576	201.504
8.10409	201.745
8.11242	202.212
8.12075	202.969
8.12909	201.911
8.13742	202.881
8.14575	202.373
8.15409	203.287
8.16242	202.353
8.17075	203.481
8.17909	205.247
8.18742	205.861
8.19575	204.682
8.20409	204.58
8.21242	203.267
8.22075	203.054
8.22909	203.086
8.23742	204.788
8.24575	203.769
8.25409	204.382
8.26242	206.284
8.27075	207.767
8.27909	208.801
8.28742	206.871
8.29575	207.06
8.30409	207.44
8.31242	209.383
8.32075	210.086
8.32908	209.132
8.33742	208.212
8.34575	208.243
8.35408	208.756
8.36242	210.036
8.37075	211.761
8.37908	212.976
8.38742	212.473
8.39575	213.694
8.40408	213.168
8.41242	212.323
8.42075	213.688
8.42908	214.313
8.43742	213.854
8.44575	213.133
8.45408	215.015
8.46242	213.479
8.47075	214.448
8.47908	214.698
8.48742	215.944
8.49575	215.909
8.50408	216.896
8.51242	218.157
8.52075	218.31
8.52908	218.958
8.53742	217.761
8.54575	217.925
8.55408	216.706
8.56241	217.418
8.57075	218.077
8.57908	219.005
8.58741	218.517
8.59575	217.433
8.60408	217.194
8.61241	219.606
8.62075	220.75
8.62908	219.842
8.63741	218.989
8.64575	219.152
8.65408	219.473
8.66241	221.395
8.67075	222.997
8.67908	220.972
8.68741	218.178
8.69575	218.666
8.70408	221.59
8.71241	223.642
8.72075	222.136
8.72908	220.362
8.73741	219.276
8.74575	220.412
8.75408	220.31
8.76241	221.712
8.77074	221.771
8.77908	221.817
8.78741	219.944
8.79574	220.366
8.80408	220.643
8.81241	222.405
8.82074	221.99
8.82908	221.095
8.83741	220.308
8.84574	222.726
8.85408	223.674
8.86241	223.187
8.87074	222.35
8.87908	221.962
8.88741	221.618
8.89574	222.191
8.90408	221.829
8.91241	223.74
8.92074	225.557
8.92908	225.041
8.93741	223.089
8.94574	222.244
8.95408	222.806
8.96241	222.708
8.97074	223.924
8.97908	224.018
8.98741	225.339
8.99574	225.255
9.00407	223.879
9.01241	223.399
9.02074	226.301
9.02907	226.856
9.03741	225.247
9.04574	223.135
9.05407	225.032
9.06241	225.153
9.07074	224.965
9.07907	225.167
9.08741	226.962
9.09574	229.059
9.10407	229.407
9.11241	227.658
9.12074	226.672
9.12907	228.351
9.13741	227.662
9.14574	228.59
9.15407	229.711
9.16241	230.886
9.17074	229.419
9.17907	229.506
9.18741	228.489
9.19574	228.954
9.20407	229.918
9.2124	230.057
9.22074	229.315
9.22907	229.017
9.2374	227.878
9.24574	227.008
9.25407	226.785
9.2624	227.709
9.27074	229.578
9.27907	229.46
9.2874	228.624
9.29574	228.202
9.30407	229.707
9.3124	231.271
9.32074	232.469
9.32907	231.922
9.3374	230.013
9.34574	228.995
9.35407	229.724
9.3624	230.022
9.37074	230.1
9.37907	230.046
9.3874	230.264
9.39574	231.301
9.40407	231.73
9.4124	232.396
9.42073	231.612
9.42907	231.296
9.4374	228.838
9.44573	228.14
9.45407	229.539
9.4624	231.915
9.47073	234.127
9.47907	233.805
9.4874	233.939
9.49573	232.188
9.50407	232.328
9.5124	232.593
9.52073	233.827
9.52907	233.161
9.5374	231.601
9.54573	232.939
9.55407	233.754
9.5624	235.928
9.57073	236.057
9.57907	236.373
9.5874	234.204
9.59573	234.025
9.60407	234.316
9.6124	234.069
9.62073	233.826
9.62907	233.191
9.6374	233.923
9.64573	233.52
9.65406	234.695
9.6624	233.903
9.67073	233.182
9.67906	233.778
9.6874	234.123
9.69573	234.329
9.70406	235.951
9.7124	237.594
9.72073	235.974
9.72906	233.027
9.7374	234.357
9.74573	236.371
9.75406	237.836
9.7624	236.719
9.77073	236.612
9.77906	236.692
9.7874	237.076
9.79573	236.092
9.80406	237.656
9.8124	237.609
9.82073	237.913
9.82906	236.698
9.8374	238.317
9.84573	238.28
9.85406	238.635
9.86239	236.873
9.87073	236.754
9.87906	237.834
9.88739	237.906
9.89573	237.617
9.90406	237.88
9.91239	237.978
9.92073	237.157
9.92906	237.025
9.93739	239.704
9.94573	241.111
9.95406	240.705
9.96239	238.93
9.97073	239.393
9.97906	239.542
9.98739	238.114
9.99573	236.664
10.0041	235.726
10.0124	238.504
10.0207	241.716
10.0291	240.764
10.0374	237.205
10.0457	237.757
10.0541	241.203
10.0624	240.178
10.0707	237.884
10.0791	238.103
10.0874	239.369
10.0957	239.188
10.1041	239.976
10.1124	242.04
10.1207	241.938
10.1291	240.933
10.1374	240.509
10.1457	240.052
10.1541	239.623
10.1624	239.568
10.1707	239.996
10.1791	240.516
10.1874	241.025
10.1957	240.669
10.2041	242.117
10.2124	241.699
10.2207	241.361
10.2291	240.945
10.2374	241.796
10.2457	242.684
10.2541	242.045
10.2624	243.082
10.2707	240.97
10.2791	241.088
10.2874	240.461
10.2957	242.013
10.3041	242.449
10.3124	242.573
10.3207	241.604
10.3291	240.225
10.3374	241.968
10.3457	243.552
10.3541	243.715
10.3624	242.05
10.3707	242.91
10.379	243.164
10.3874	241.694
10.3957	238.889
10.404	239.921
10.4124	242.816
10.4207	243.73
10.4291	241.994
10.4374	242.336
10.4457	242.243
10.4541	240.968
10.4624	239.461
10.4707	240.908
10.4791	243.095
10.4874	244.228
10.4957	243.328
10.504	241.879
10.5124	242.02
10.5207	244.399
10.529	243.463
10.5374	242.492
10.5457	240.405
10.5541	241.131
10.5624	241.131
10.5707	243.822
10.5791	245.356
10.5874	243.641
10.5957	243.109
10.6041	243.536
10.6124	244.954
10.6207	243.903
10.629	244.127
10.6374	243.219
10.6457	242.256
10.654	241.515
10.6624	243.691
10.6707	244.831
10.6791	245.405
10.6874	242.415
10.6957	242.732
10.7041	242.443
10.7124	243.642
10.7207	241.65
10.7291	244.381
10.7374	245.31
10.7457	245.001
10.754	242.849
10.7624	243.437
10.7707	242.258
10.779	241.334
10.7874	241.945
10.7957	244.662
10.8041	245.578
10.8124	247.063
10.8207	245.748
10.8291	243.647
10.8374	243.453
10.8457	244.92
10.8541	244.916
10.8624	242.569
10.8707	242.308
10.879	243.864
10.8874	246.148
10.8957	246.342
10.904	244.339
10.9124	243.33
10.9207	243.558
10.9291	243.044
10.9374	242.693
10.9457	243.181
10.954	244.337
10.9624	242.572
10.9707	244.297
10.979	243.853
10.9874	244.242
10.9957	243.806
11.004	245.553
11.0124	246.737
11.0207	244.929
11.029	243.957
11.0374	244.615
11.0457	246.337
11.054	245.476
11.0624	245.047
11.0707	246.452
11.079	246.609
11.0874	246.875
11.0957	247.256
11.104	245.73
11.1124	245.332
11.1207	245.958
11.129	248.382
11.1374	247.071
11.1457	246.264
11.154	246.759
11.1624	248.326
11.1707	246.328
11.179	245.589
11.1874	245.323
11.1957	245.966
11.204	245.784
11.2124	247.945
11.2207	247.702
11.229	246.827
11.2374	244.787
11.2457	244.564
11.254	245.286
11.2624	247.639
11.2707	247.29
11.279	246.061
11.2874	246.393
11.2957	246.919
11.304	246.187
11.3124	247.745
11.3207	248.094
11.329	246.54
11.3374	244.713
11.3457	246.075
11.354	246.437
11.3624	246.342
11.3707	246.167
11.379	246.288
11.3874	247.694
11.3957	246.013
11.404	244.202
11.4124	244.924
11.4207	248.484
11.429	248.152
11.4374	245.243
11.4457	245.314
11.454	247.439
11.4624	247.958
11.4707	248.945
11.479	249.038
11.4874	248.27
11.4957	247.6
11.504	247.535
11.5124	247.264
11.5207	247.894
11.529	247.991
11.5374	247.546
11.5457	247.838
11.554	248.016
11.5624	247.677
11.5707	248.559
11.579	249.569
11.5874	248.314
11.5957	248.647
11.604	248.073
11.6124	247.096
11.6207	246.814
11.629	249.282
11.6374	248.617
11.6457	247.522
11.654	247.251
11.6624	247.923
11.6707	245.534
11.679	245.591
11.6874	247.431
11.6957	248.178
11.704	247.16
11.7124	247.764
11.7207	248.831
11.729	248.067
11.7374	247.513
11.7457	247.483
11.754	249.282
11.7624	248.924
11.7707	247.601
11.779	245.648
11.7874	246.493
11.7957	246.827
11.804	248.239
11.8124	248.738
11.8207	248.083
11.829	247.28
11.8374	247.029
11.8457	246.88
11.854	248.85
11.8624	250.824
11.8707	249.134
11.879	247.11
11.8874	248.032
11.8957	248.655
11.904	249.724
11.9124	248.978
11.9207	249.586
11.929	249.654
11.9374	251.116
11.9457	249.082
11.954	248.816
11.9624	248.34
11.9707	249.007
11.979	249.965
11.9874	250.514
11.9957	250.572
12.004	251.606
12.0124	251.872
12.0207	250.143
12.029	249.363
12.0374	249.597
12.0457	249.749
12.054	247.853
12.0624	248.495
12.0707	249.68
12.079	252.07
12.0874	250.585
12.0957	249.686
12.104	249.425
12.1124	248.581
12.1207	247.854
12.129	248.382
12.1374	249.037
12.1457	248.842
12.154	250.006
12.1624	250.365
12.1707	250.209
12.179	250.229
12.1874	249.993
12.1957	249.965
12.204	251.153
12.2124	250.346
12.2207	249.596
12.229	249.218
12.2374	250.339
12.2457	249.951
12.254	250.487
12.2624	250.182
12.2707	250.328
12.279	252.126
12.2874	250.986
12.2957	249.54
12.304	249.36
12.3124	250.277
12.3207	248.522
12.329	246.612
12.3374	248.507
12.3457	249.335
12.354	250.885
12.3624	251.199
12.3707	251.428
12.379	250.204
12.3874	248.532
12.3957	248.417
12.404	249.696
12.4124	251.542
12.4207	252.023
12.429	250.547
12.4374	249.979
12.4457	249.205
12.454	249.82
12.4624	249.953
12.4707	250.916
12.479	251.26
12.4873	249.67
12.4957	248.255
12.504	246.802
12.5123	247.221
12.5207	249.43
12.529	251.837
12.5373	252.563
12.5457	250.403
12.554	250.947
12.5624	250.983
12.5707	252.653
12.579	252.498
12.5874	252.519
12.5957	251.021
12.604	251.553
12.6123	250.311
12.6207	249.731
12.629	249.171
12.6373	251.358
12.6457	251.526
12.654	250.85
12.6623	249.621
12.6707	250.144
12.679	252.535
12.6874	254.152
12.6957	255.215
12.704	253.744
12.7124	250.127
12.7207	249.658
12.729	251.05
12.7373	251.702
12.7457	250.535
12.754	251.155
12.7623	252.155
12.7707	251.583
12.779	250.843
12.7873	252.387
12.7957	253.634
12.804	253.056
12.8124	250.055
12.8207	250.829
12.829	251.989
12.8374	251.722
12.8457	249.74
12.854	250.47
12.8623	251.018
12.8707	251.398
12.879	251.989
12.8873	252.708
12.8957	252.549
12.904	251.258
12.9123	249.53
12.9207	249.101
12.929	250.153
12.9374	251.308
12.9457	249.461
12.954	250.113
12.9624	251.937
12.9707	254.032
12.979	252.654
12.9873	252.528
12.9957	253.477
13.004	254.102
13.0123	250.669
13.0207	247.902
13.029	249.518
13.0373	252.401
13.0457	253.98
13.054	252.674
13.0624	253.628
13.0707	253.496
13.079	252.464
13.0874	251.318
13.0957	252.126
13.104	252.716
13.1123	251.547
13.1207	252.525
13.129	252.715
13.1373	251.384
13.1457	251.209
13.154	252.708
13.1623	252.502
13.1707	253.358
13.179	252.938
13.1873	251.966
13.1957	251.209
13.204	252.289
13.2123	250.852
13.2207	249.276
13.229	249.537
13.2373	253.776
13.2457	254.172
13.254	253.825
13.2623	252.06
13.2707	252.708
13.279	251.694
13.2873	251.947
13.2957	253.05
13.304	253.247
13.3123	253.303
13.3207	251.408
13.329	250.886
13.3373	250.79
13.3457	252.04
13.354	253.276
13.3623	253.681
13.3707	253.264
13.379	252.239
13.3873	253.695
13.3957	254.575
13.404	251.86
13.4123	249.849
13.4207	251.798
13.429	253.795
13.4373	251.249
13.4457	250.136
13.454	252.439
13.4623	253.056
13.4707	252.39
13.479	252.528
13.4873	253.123
13.4957	251.838
13.504	250.377
13.5123	250.822
13.5207	252.005
13.529	253.563
13.5373	252.893
13.5457	250.587
13.554	251.734
13.5623	253.323
13.5707	252.345
13.579	250.659
13.5873	253.734
13.5957	255.261
13.604	254.799
13.6123	253.003
13.6207	252.995
13.629	254.223
13.6373	255.794
13.6457	255.935
13.654	253.561
13.6623	251.493
13.6707	251.734
13.679	253.465
13.6873	253.631
13.6957	253.245
13.704	254.125
13.7123	253.312
13.7207	252.464
13.729	251.739
13.7373	253.07
13.7457	253.631
13.754	254.001
13.7623	252.477
13.7707	252.42
13.779	253.887
13.7873	256.254
13.7957	256.104
13.804	254.774
13.8123	252.177
13.8207	252.235
13.829	253.446
13.8373	255.082
13.8457	252.854
13.854	252.276
13.8623	252.147
13.8707	253.669
13.879	252.743
13.8873	252.477
13.8957	253.441
13.904	253.721
13.9123	251.793
13.9207	250.812
13.929	252.933
13.9373	253.612
13.9457	253.221
13.954	252.971
13.9623	252.236
13.9707	251.502
13.979	252.574
13.9873	255.048
13.9957	255.214
14.004	254.216
14.0123	254.193
14.0207	254.798
14.029	254.6
14.0373	253.854
14.0457	254.105
14.054	253.722
14.0623	252.892
14.0707	252.392
14.079	253.57
14.0873	254.618
14.0957	255.079
14.104	254.903
14.1123	255.053
14.1207	254.58
14.129	254.036
14.1373	254.719
14.1457	256.077
14.154	255.2
14.1623	254.804
14.1707	253.477
14.179	253.846
14.1873	253.119
14.1957	252.424
14.204	251.776
14.2123	253.853
14.2207	255.201
14.229	255.288
14.2373	255.428
14.2457	254.126
14.254	252.161
14.2623	254.533
14.2707	257.467
14.279	257.238
14.2873	255.318
14.2957	253.422
14.304	252.734
14.3123	254.478
14.3207	255.114
14.329	254.49
14.3373	253.409
14.3457	253.775
14.354	252.959
14.3623	252.978
14.3707	253.771
14.379	254.361
14.3873	252.545
14.3957	252.385
14.404	252.069
14.4123	254.444
14.4207	253.832
14.429	254.646
14.4373	253.908
14.4457	253.947
14.454	253.475
14.4623	253.874
14.4707	254.146
14.479	253.113
14.4873	251.871
14.4957	252.665
14.504	252.643
14.5123	253.28
14.5207	253.637
14.529	254.673
14.5373	254.292
14.5457	253.966
14.554	254.164
14.5623	253.461
14.5707	253.632
14.579	252.758
14.5873	253.68
14.5957	252.972
14.604	253.716
14.6123	254.192
14.6207	256.108
14.629	254.904
14.6373	253.003
14.6457	252.096
14.654	254.243
14.6623	255.021
14.6707	254.321
14.679	253.252
14.6873	255.246
14.6957	256.267
14.704	256.199
14.7123	255.381
14.7206	254.683
14.729	253.886
14.7373	254.312
14.7456	254.248
14.754	252.731
14.7623	252.589
14.7706	253.302
14.779	253.262
14.7873	251.984
14.7957	253.604
14.804	254.976
14.8123	256.501
14.8207	256.652
14.829	255.876
14.8373	256.129
14.8456	255.984
14.854	256.035
14.8623	254.918
14.8706	255.926
14.879	254.848
14.8873	254.425
14.8956	255.611
14.904	255.627
14.9123	253.125
14.9207	253.381
14.929	254.811
14.9373	255.221
14.9457	253.145
14.954	256.539
14.9623	258.689
14.9706	260.499
14.979	257.239
14.9873	255.573
14.9956	256.09
15.004	257.41
15.0123	256.713
15.0206	255.963
15.029	257.207
15.0373	257.099
15.0457	258.137
15.054	257.808
15.0623	257.164
15.0707	256.848
15.079	257.558
15.0873	255.691
15.0956	255.051
15.104	256.133
15.1123	255.645
15.1206	254.79
15.129	256.322
15.1373	258.172
15.1456	257.579
15.154	255.272
15.1623	253.922
15.1707	254.477
15.179	256.284
15.1873	255.009
15.1957	254.606
15.204	254.988
15.2123	256.994
15.2206	256.438
15.229	256.172
15.2373	255.711
15.2456	256.308
15.254	257.086
15.2623	257.791
15.2706	257.115
15.279	256.804
15.2873	255.089
15.2957	255.176
15.304	255.385
15.3123	256.419
15.3206	255.233
15.329	256.005
15.3373	259.438
15.3456	260.108
15.354	258.248
15.3623	256.439
15.3706	256.958
15.379	256.881
15.3873	257.718
15.3956	259.803
15.404	259.051
15.4123	257.279
15.4206	255.978
15.429	257.467
15.4373	256.292
15.4456	256.434
15.454	256.92
15.4623	256.28
15.4706	256.94
15.479	257.951
15.4873	258.855
15.4956	255.698
15.504	256.129
15.5123	255.762
15.5206	256.683
15.529	256.344
15.5373	257.45
15.5456	258.375
15.554	258.478
15.5623	260.463
15.5706	260.686
15.579	258.294
15.5873	254.538
15.5956	254.556
15.604	257.546
15.6123	257.673
15.6206	257.368
15.629	256.47
15.6373	258.187
15.6456	258.203
15.654	258.649
15.6623	258.126
15.6706	258.737
15.679	258.8
15.6873	259.574
15.6956	257.621
15.704	255.466
15.7123	254.46
15.7206	257.077
15.729	258.79
15.7373	260.149
15.7456	259.668
15.754	258.842
15.7623	256.673
15.7706	257.874
15.779	257.797
15.7873	258.171
15.7956	255.455
15.804	256.255
15.8123	257.696
15.8206	259.498
15.829	258.229
15.8373	257.275
15.8456	258.329
15.854	258.18
15.8623	259.043
15.8706	258.232
15.879	257.558
15.8873	257.936
15.8956	258.751
15.904	258.29
15.9123	257.185
15.9206	258.968
15.929	259.791
15.9373	258.831
15.9456	256.875
15.954	256.948
15.9623	257.997
15.9706	258.362
15.979	258.547
15.9873	258.449
15.9956	257.474
16.004	257.141
16.0123	258.215
16.0206	258.721
16.029	257.444
16.0373	257.013
16.0456	256.689
16.054	257.983
16.0623	259.052
16.0706	259.053
16.079	257.871
16.0873	257.178
16.0956	259.307
16.104	260.621
16.1123	259.051
16.1206	258.592
16.129	258.48
16.1373	260.032
16.1456	259.082
16.154	259.441
16.1623	256.648
16.1706	257.235
16.179	257.505
16.1873	258.977
16.1956	257.536
16.204	256.922
16.2123	258.172
16.2206	260.817
16.229	260.976
16.2373	258.776
16.2456	258.833
16.254	258.052
16.2623	257.485
16.2706	256.026
16.279	258.914
16.2873	258.65
16.2956	257.821
16.304	257.415
16.3123	260.624
16.3206	260.801
16.329	258.403
16.3373	256.638
16.3456	258.078
16.354	259.037
16.3623	259.257
16.3706	258.281
16.379	259.075
16.3873	259.227
16.3956	260.017
16.404	259.411
16.4123	258.451
16.4206	257.908
16.429	257.656
16.4373	258.131
16.4456	259.632
16.454	262.857
16.4623	261.862
16.4706	259.238
16.479	257.752
16.4873	258.636
16.4956	258.473
16.504	259.222
16.5123	259.861
16.5206	258.365
16.529	258.034
16.5373	260.362
16.5456	260.886
16.554	258.964
16.5623	257.626
16.5706	260.156
16.579	261.888
16.5873	260.915
16.5956	259.07
16.604	257.466
16.6123	257.45
16.6206	257.411
16.629	260.438
16.6373	261.81
16.6456	261.094
16.654	259.491
16.6623	261.106
16.6706	261.495
[truncated: 2,800 more rows]

## Sheet: Figure S2
Aptamer		F/F0	Stdev.
Tb-1	0.5 µM	0.19861	0.00332
	1 µM	0.16862	0.000219
Tb-4	0.5 µM	0.67926	0.02834
	5 µM	0.44891	0.02022
OTC43	0.5 µM	0.87621	0.0449
	1 µM	0.77466	0.01552
	5 µM	0.78709	0.06182
	500 µM	0.9576	0.13207
IBF-1	0.5 µM	0.90411	0.01863
	1 µM	0.89758	0.08665
	5 µM	0.84653	0.14506
	500 µM	0.87332	0.11472

[truncated: 10 more sheets: Figure S3, Figure S4, Figure S5A, Figure S5B, Figure S5C, Figure S5D， E， F, Figure S6, Figure S7C, Figure S8A, Figure S8B]
